# Supplementary material
Source: Springer Nature journal article supplement (https://www.springermedizin.de/resource/supplementary/12872_2014_709_MOESM1_ESM.pdf/9430706)

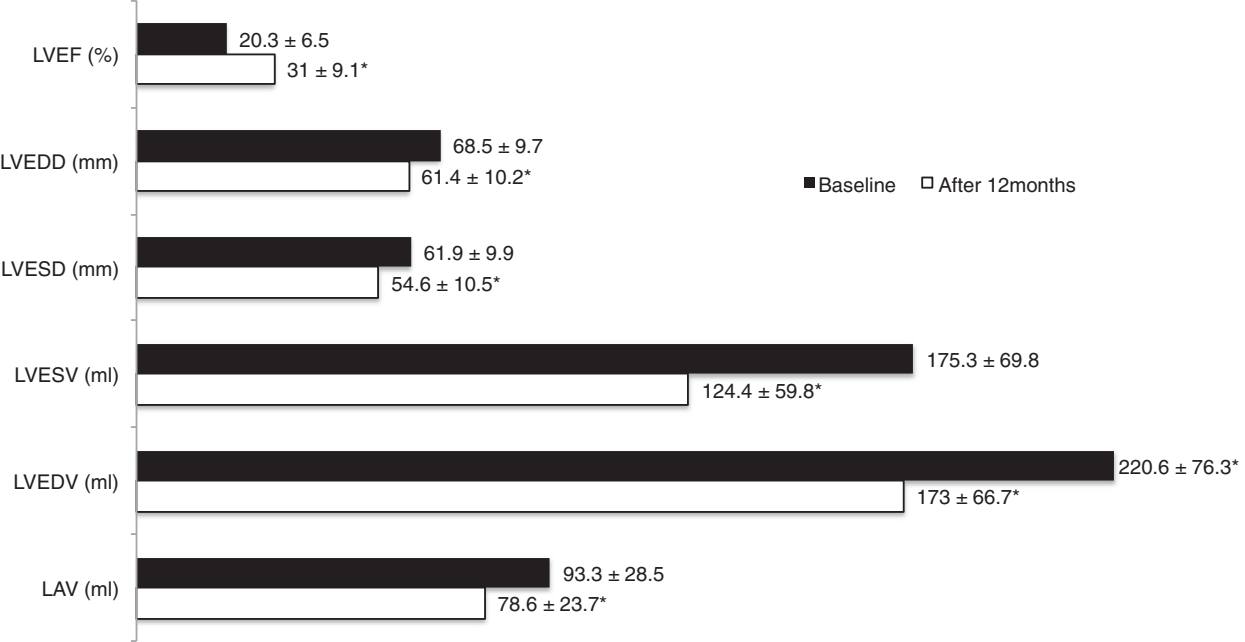

Supplement: MOESM1 [file 9430706]
